# Supplementary material for: Development and validation of glycosyltransferase related-gene for the diagnosis and prognosis of head and neck squamous cell carcinoma
Source: publisher site journal article supplement (doi:10.18632/aging.205455), 2024-01-19
Supplement: Supplementary file [file aging-v16i2-205455-supplementary-material-SD1.pdf]

SUPPLEMENTARY FIGURE

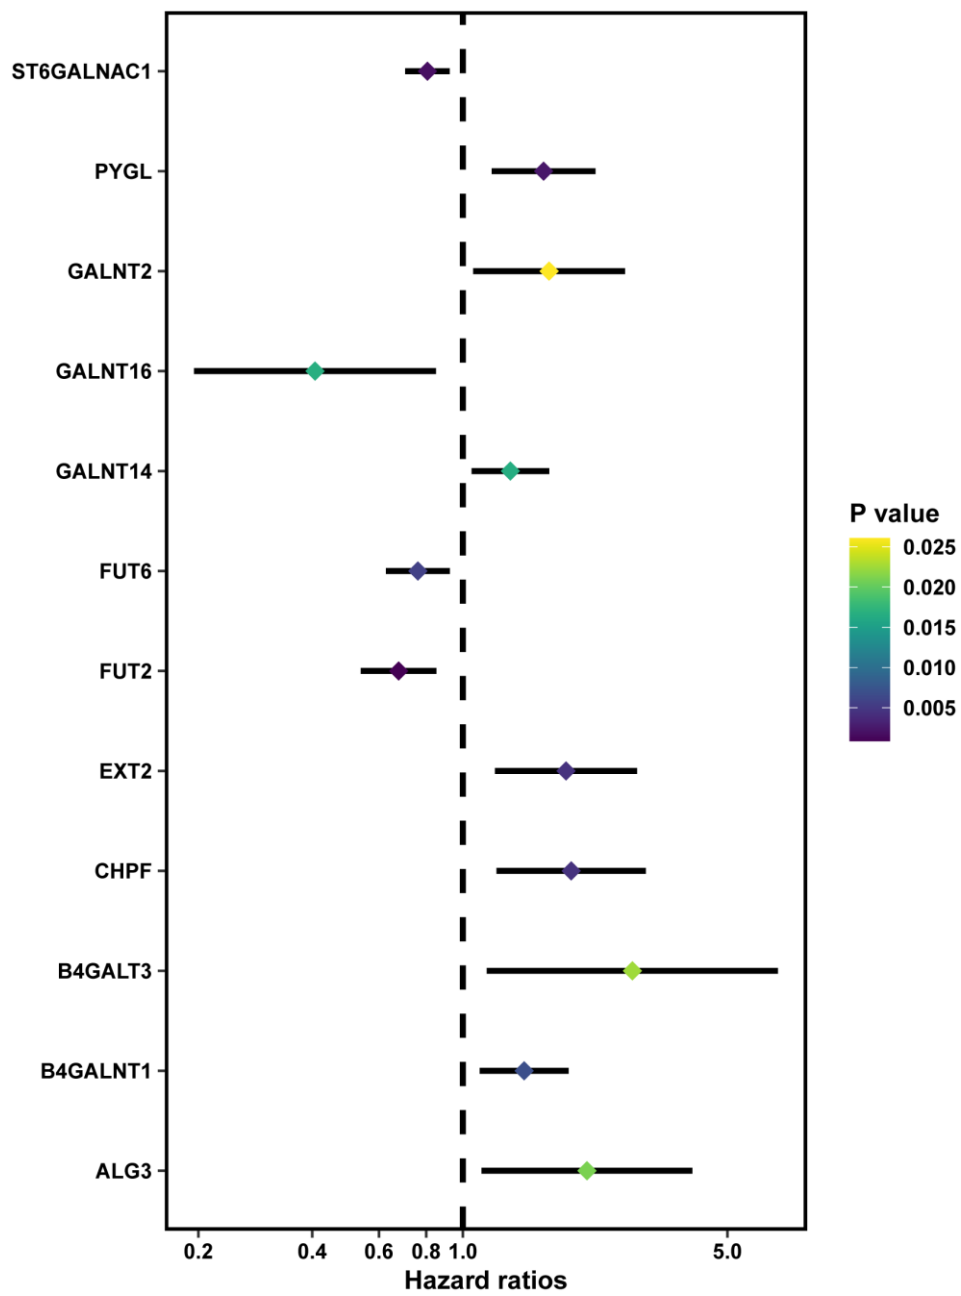

Supplementary Figure 1. The HR values of univariate Cox regression analysis.
